# Supplementary material
Source: Research Square preprint supplement (doi:10.21203/rs.3.rs-8718605/v1)
Supplement: Supplementary file 1 [file 67a662413d2dfede7cf4ec4c.docx]

**Melaminium Tris Dihydrogen Phosphate (MTDP): A New Green and Sustainable Tricationic Ionic Liquid Catalyst for the Knoevenagel Synthesis of 5-Arylidene(thio)barbituric Acids in Water**

HosseinKhorramabadi,a Nader Daneshvar,a,b Farhad Shirini *a,b Hassan Tajik a,b

*a Department of Organic Chemistry, Faculty of Chemistry, University of Guilan, Rasht, 41335-19141, Iran, Tel/Fax: +981313233262; e-mail: shirini@guilan.ac.ir (and also* [*fshirini@gmail.com*](mailto:fshirini@gmail.com)*)*

*b Department of Chemistry, University of Guilan, University Campus 2, Rasht, Iran; e-mail:* [*ndxdanshvar@gmail.com*](mailto:ndxdanshvar@gmail.com)

Table of Contents

| **Page** | **Content** |
| --- | --- |
| 2 | **TGA/DTG analysis** diagram of melamine |
| 3 | **TGA/DTG analysis** diagram of [H3-melamine][H2PO4]3. |
| 4 | **FT-IR (KBr)** spectrums of 5-(3-bromobenzylidene)-2-thioxodihydropyrimidine-4,6(1*H*,5*H*)-dione |
| 5 | **1H NMR** (400 MHz, DMSO-*d*6) of 5-(3-bromobenzylidene)-2-thioxodihydropyrimidine-4,6(1*H*,5*H*)-dione |
| 6 | **Mass analysis** diagram of 5-(3-bromobenzylidene)-2-thioxodihydropyrimidine-4,6(1*H*,5*H*)-dione |


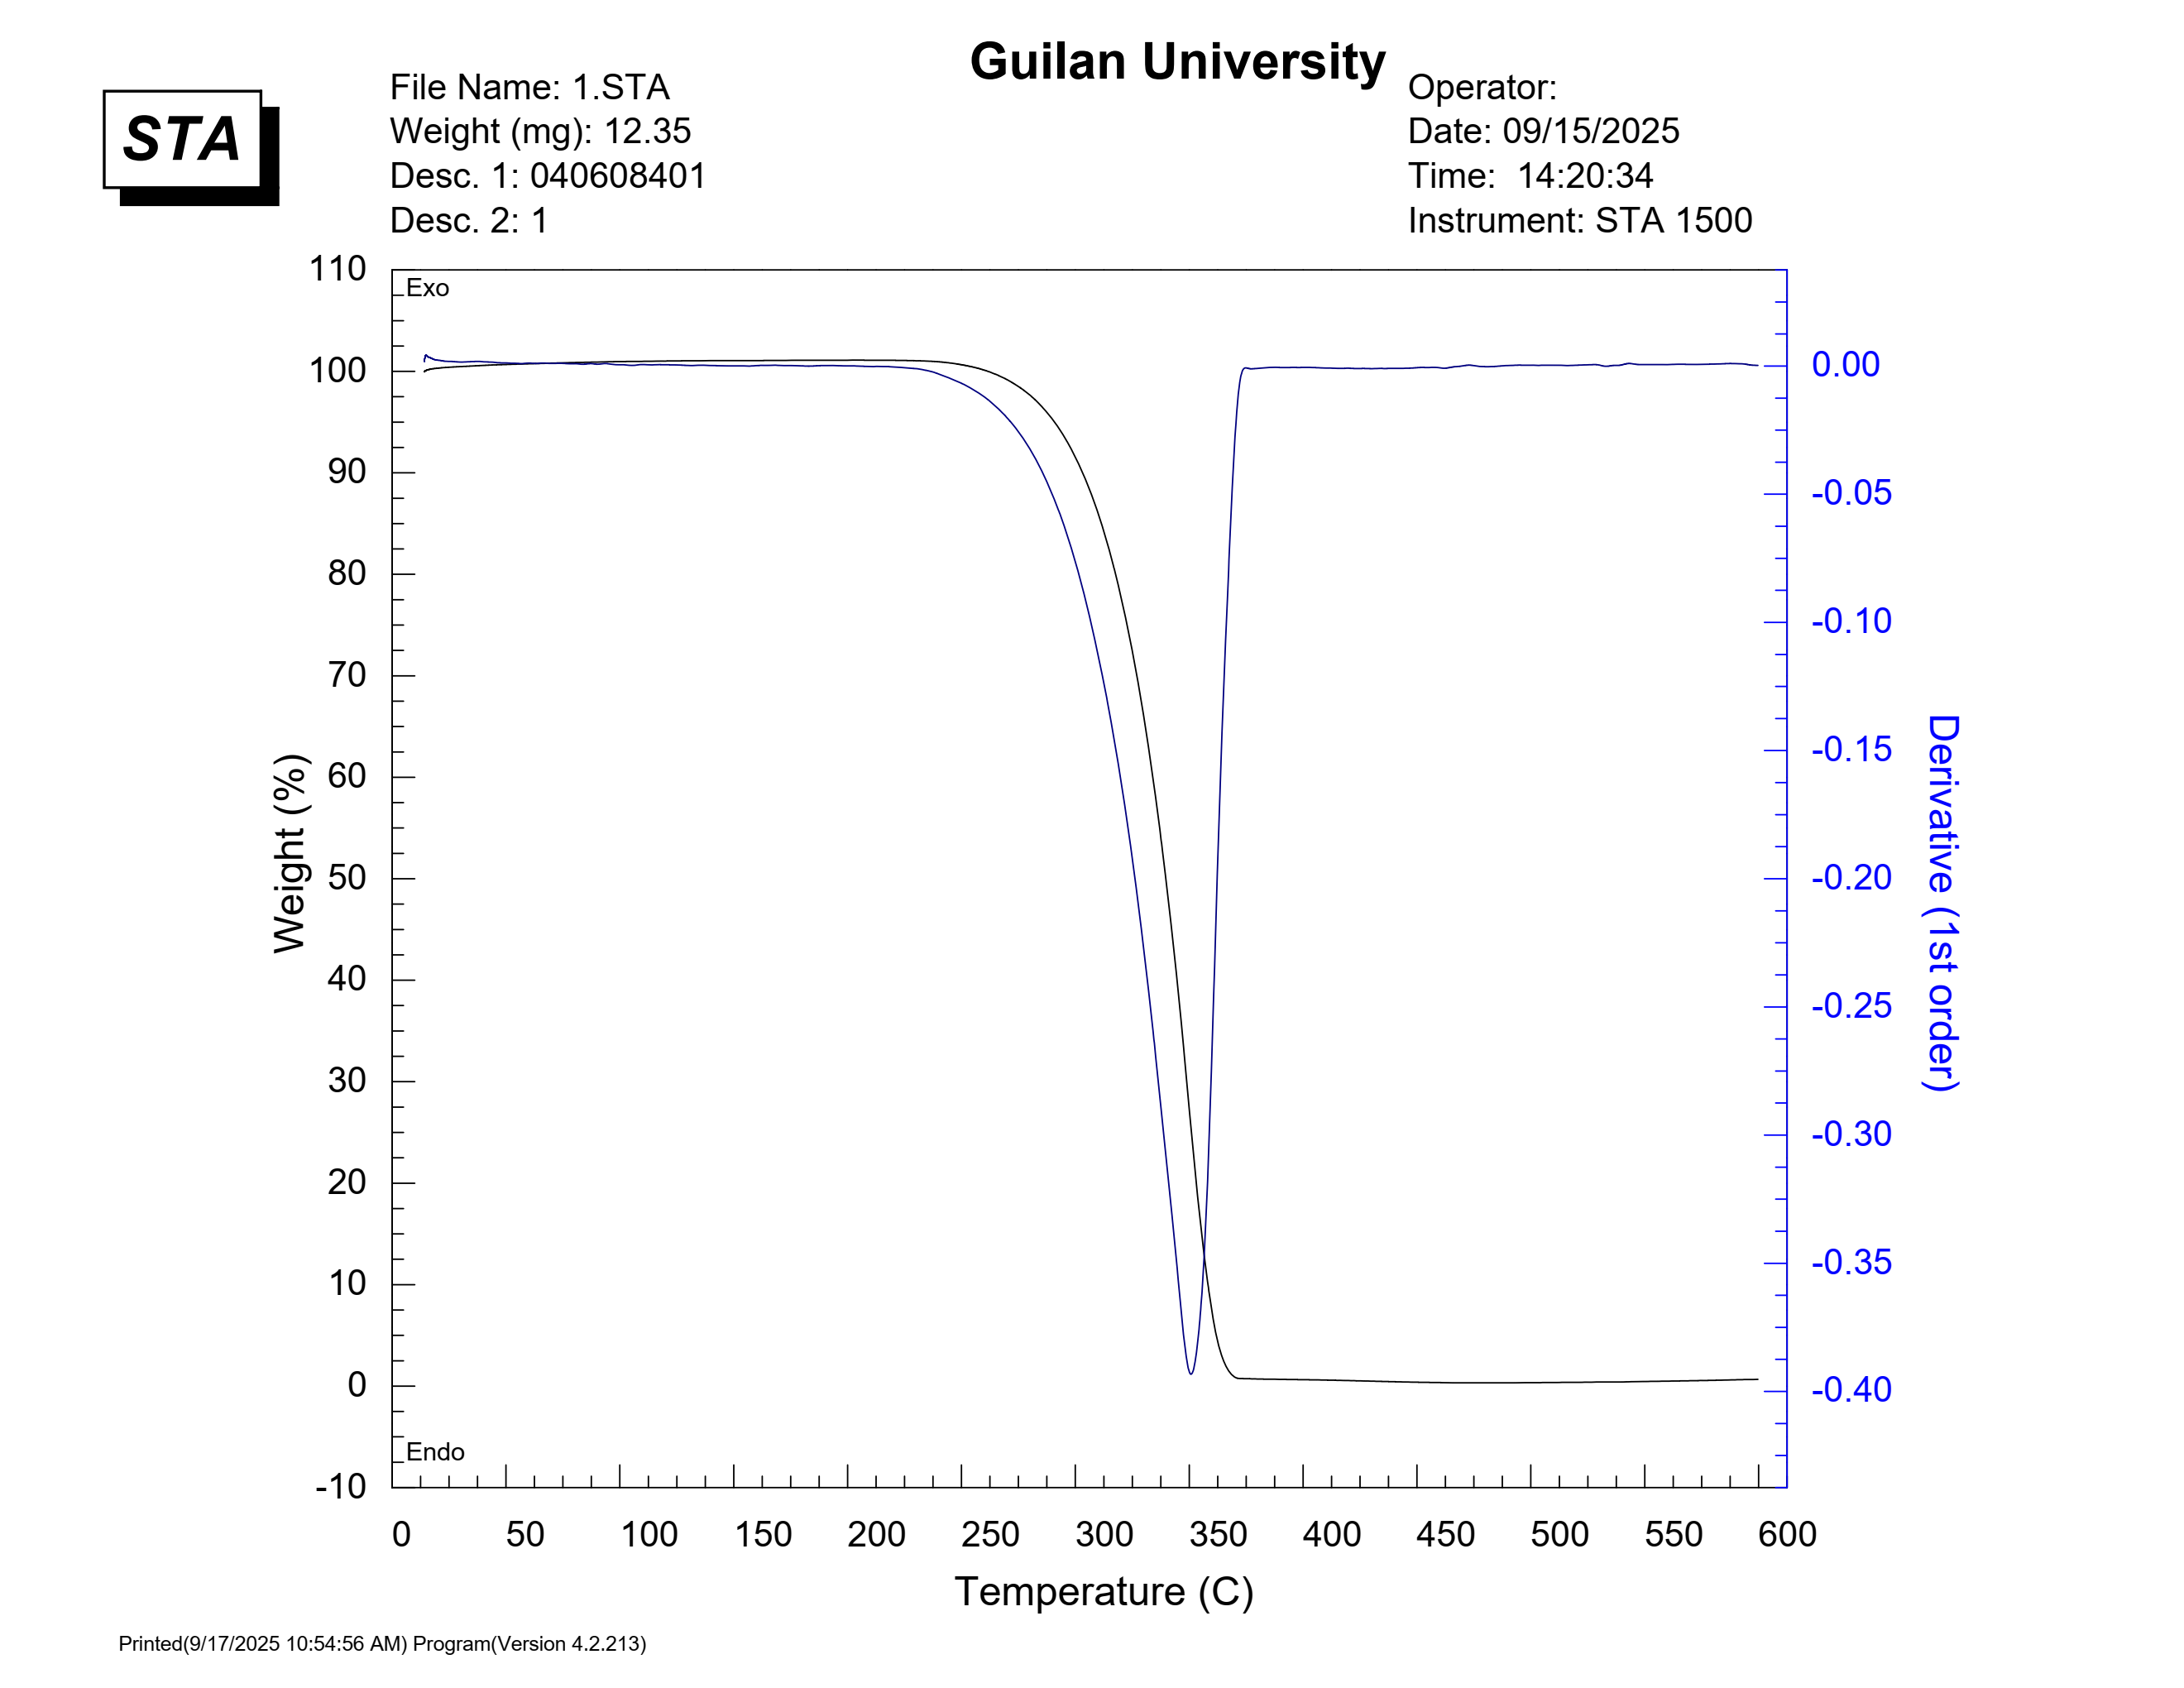


**TGA/DTG analysis** diagram of melamine


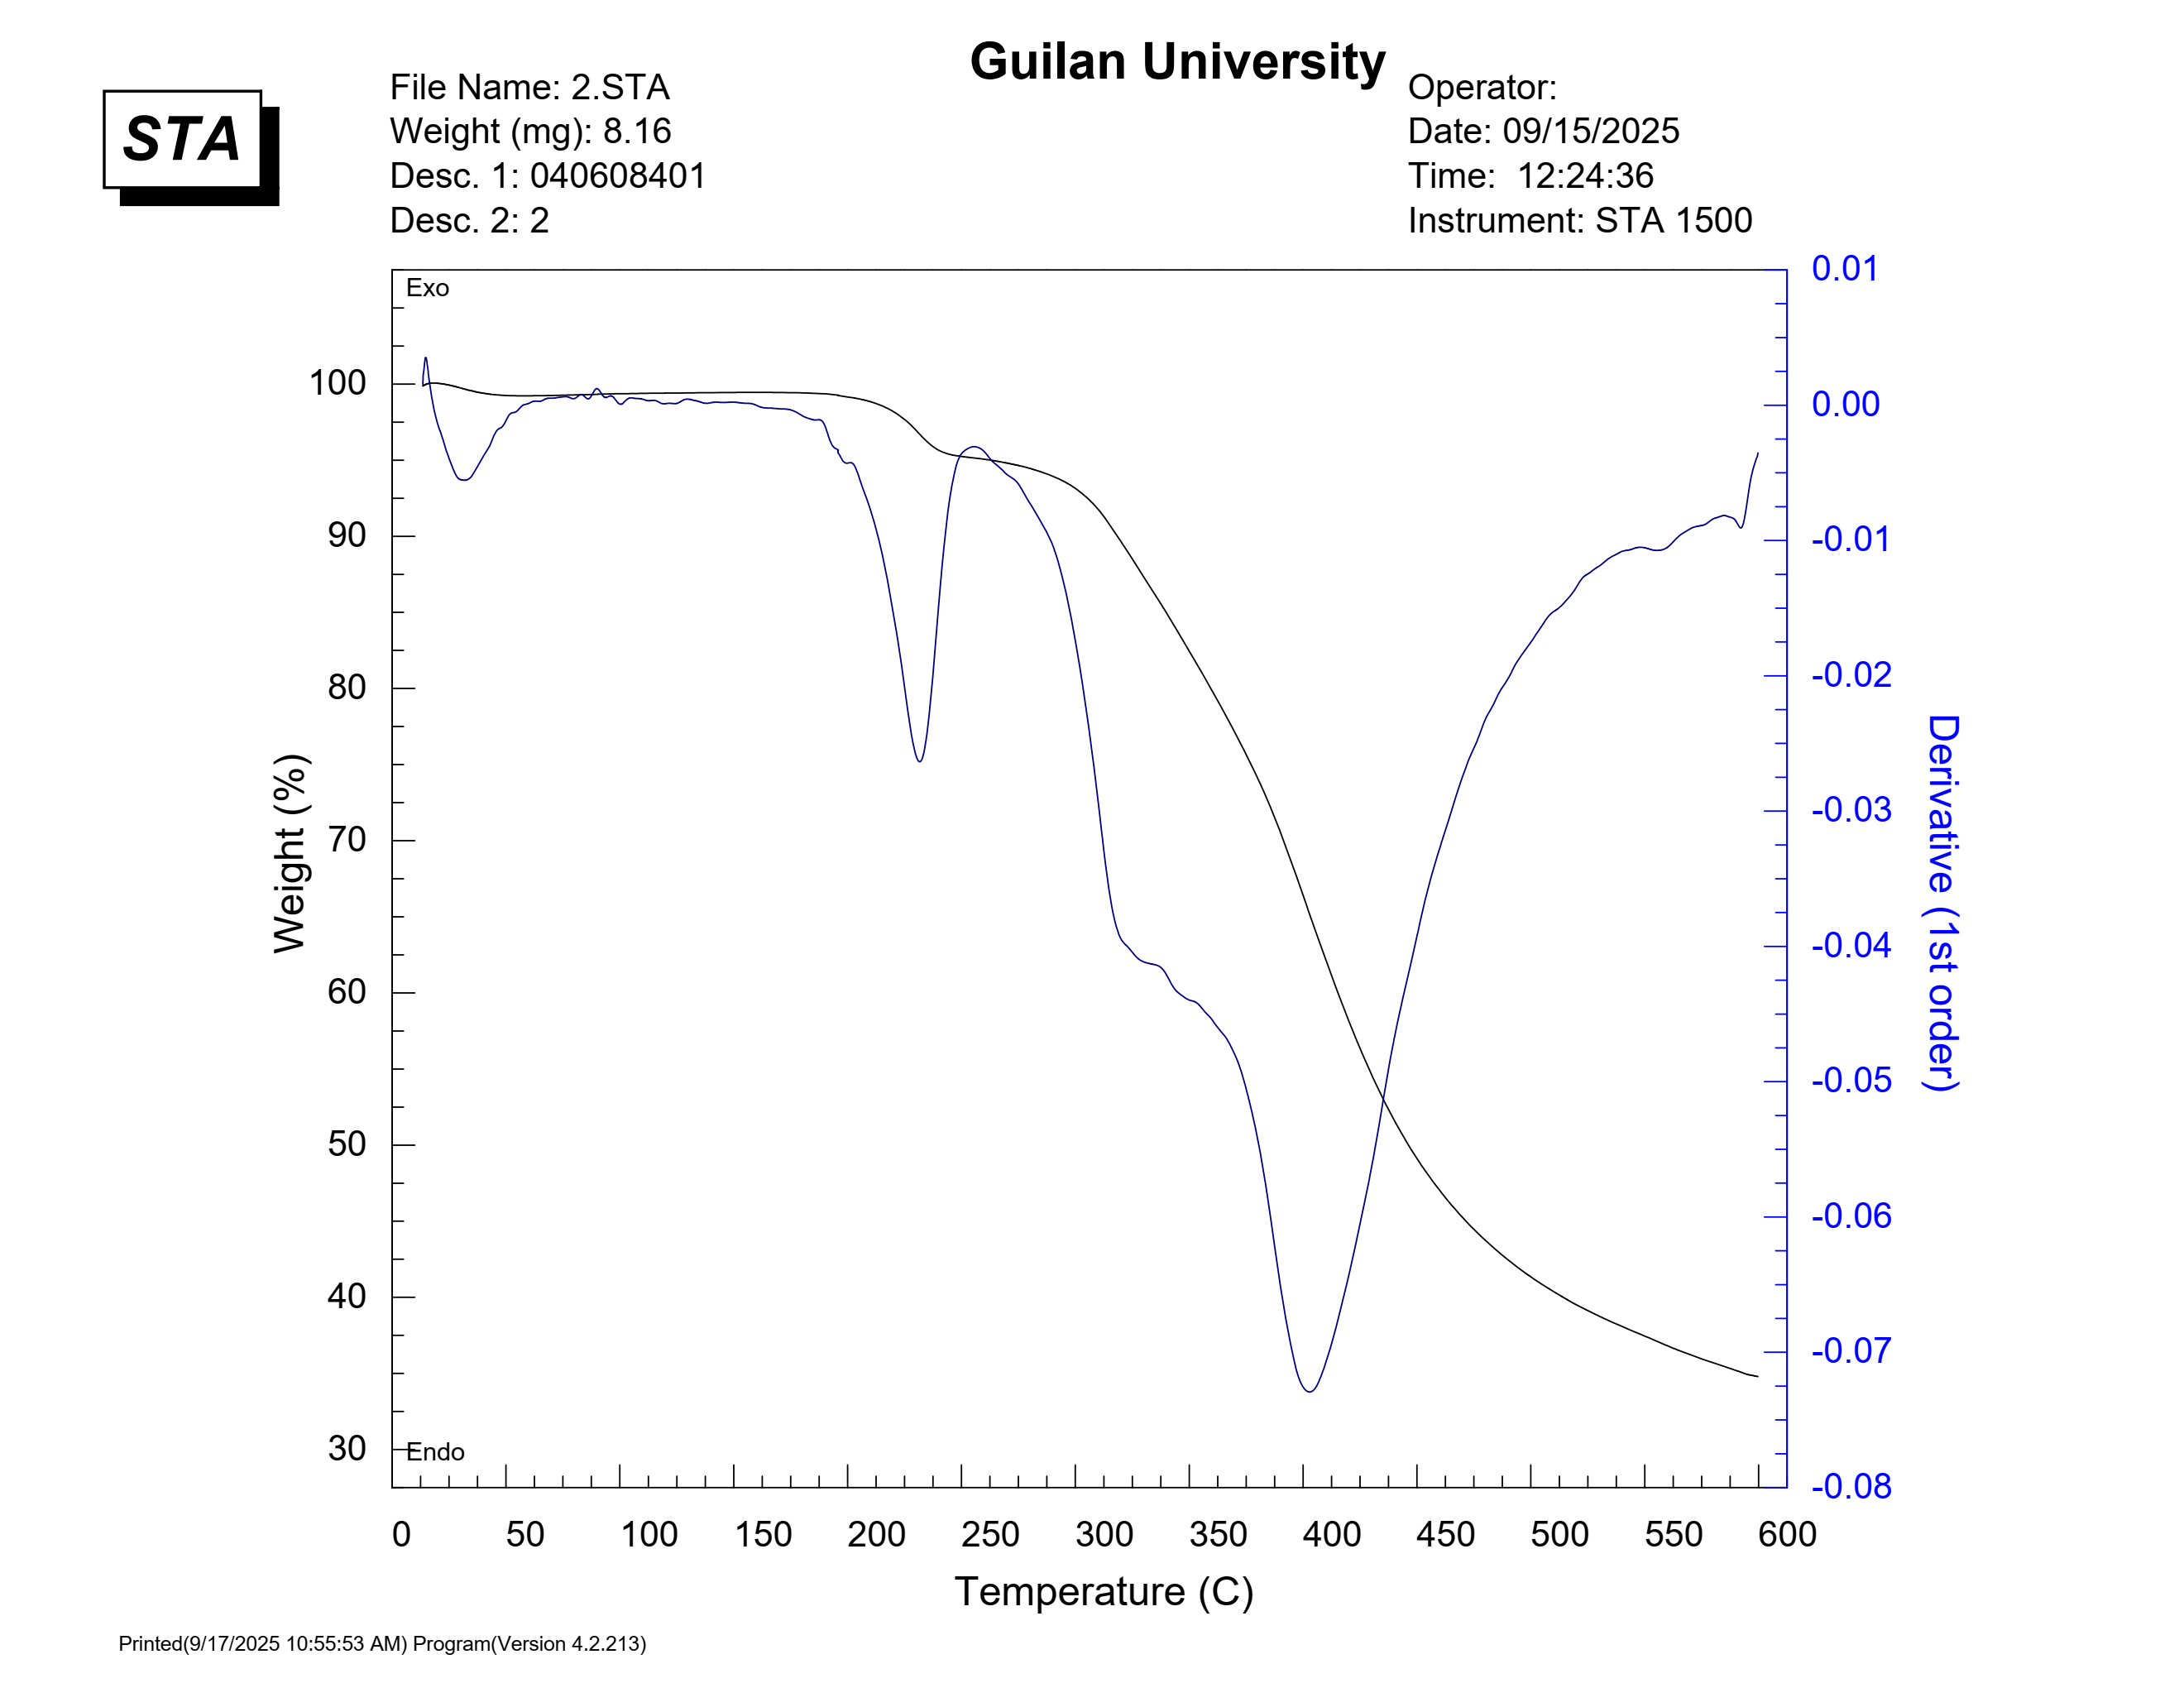


**TGA/DTG analysis** diagram of [H3-melamine][H2PO4]3


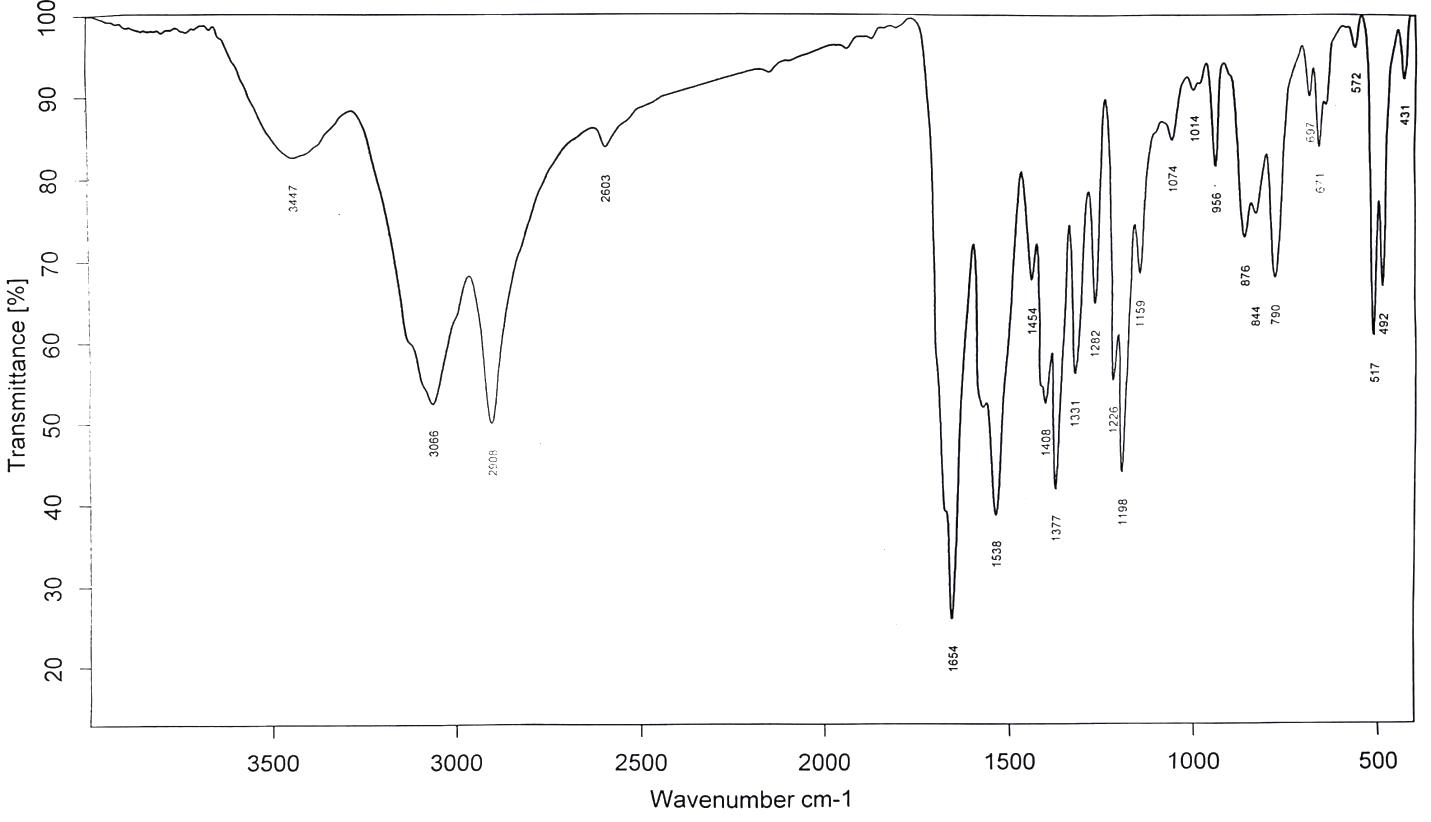


**FT-IR (KBr)** spectrums of 5-(3-bromobenzylidene)-2-thioxodihydropyrimidine-4,6(1*H*,5*H*)-dione (Table 2, Entry 27)


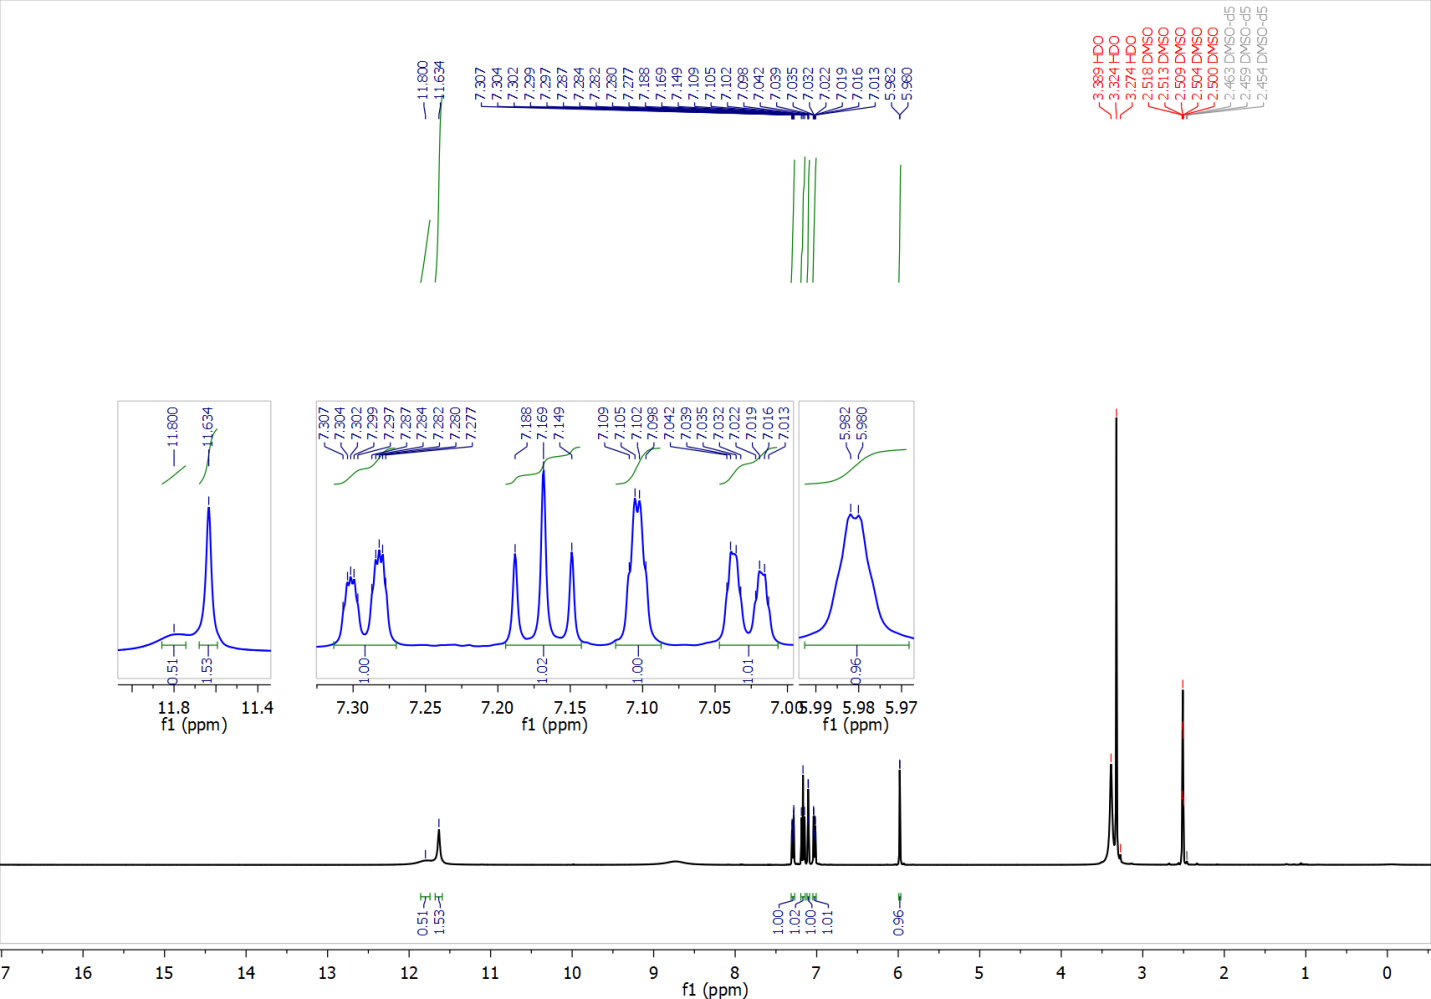


**1H NMR** (400 MHz, DMSO-*d*6) of 5-(3-bromobenzylidene)-2-thioxodihydropyrimidine-4,6(1*H*,5*H*)-dione (Table 2, Entry 27)


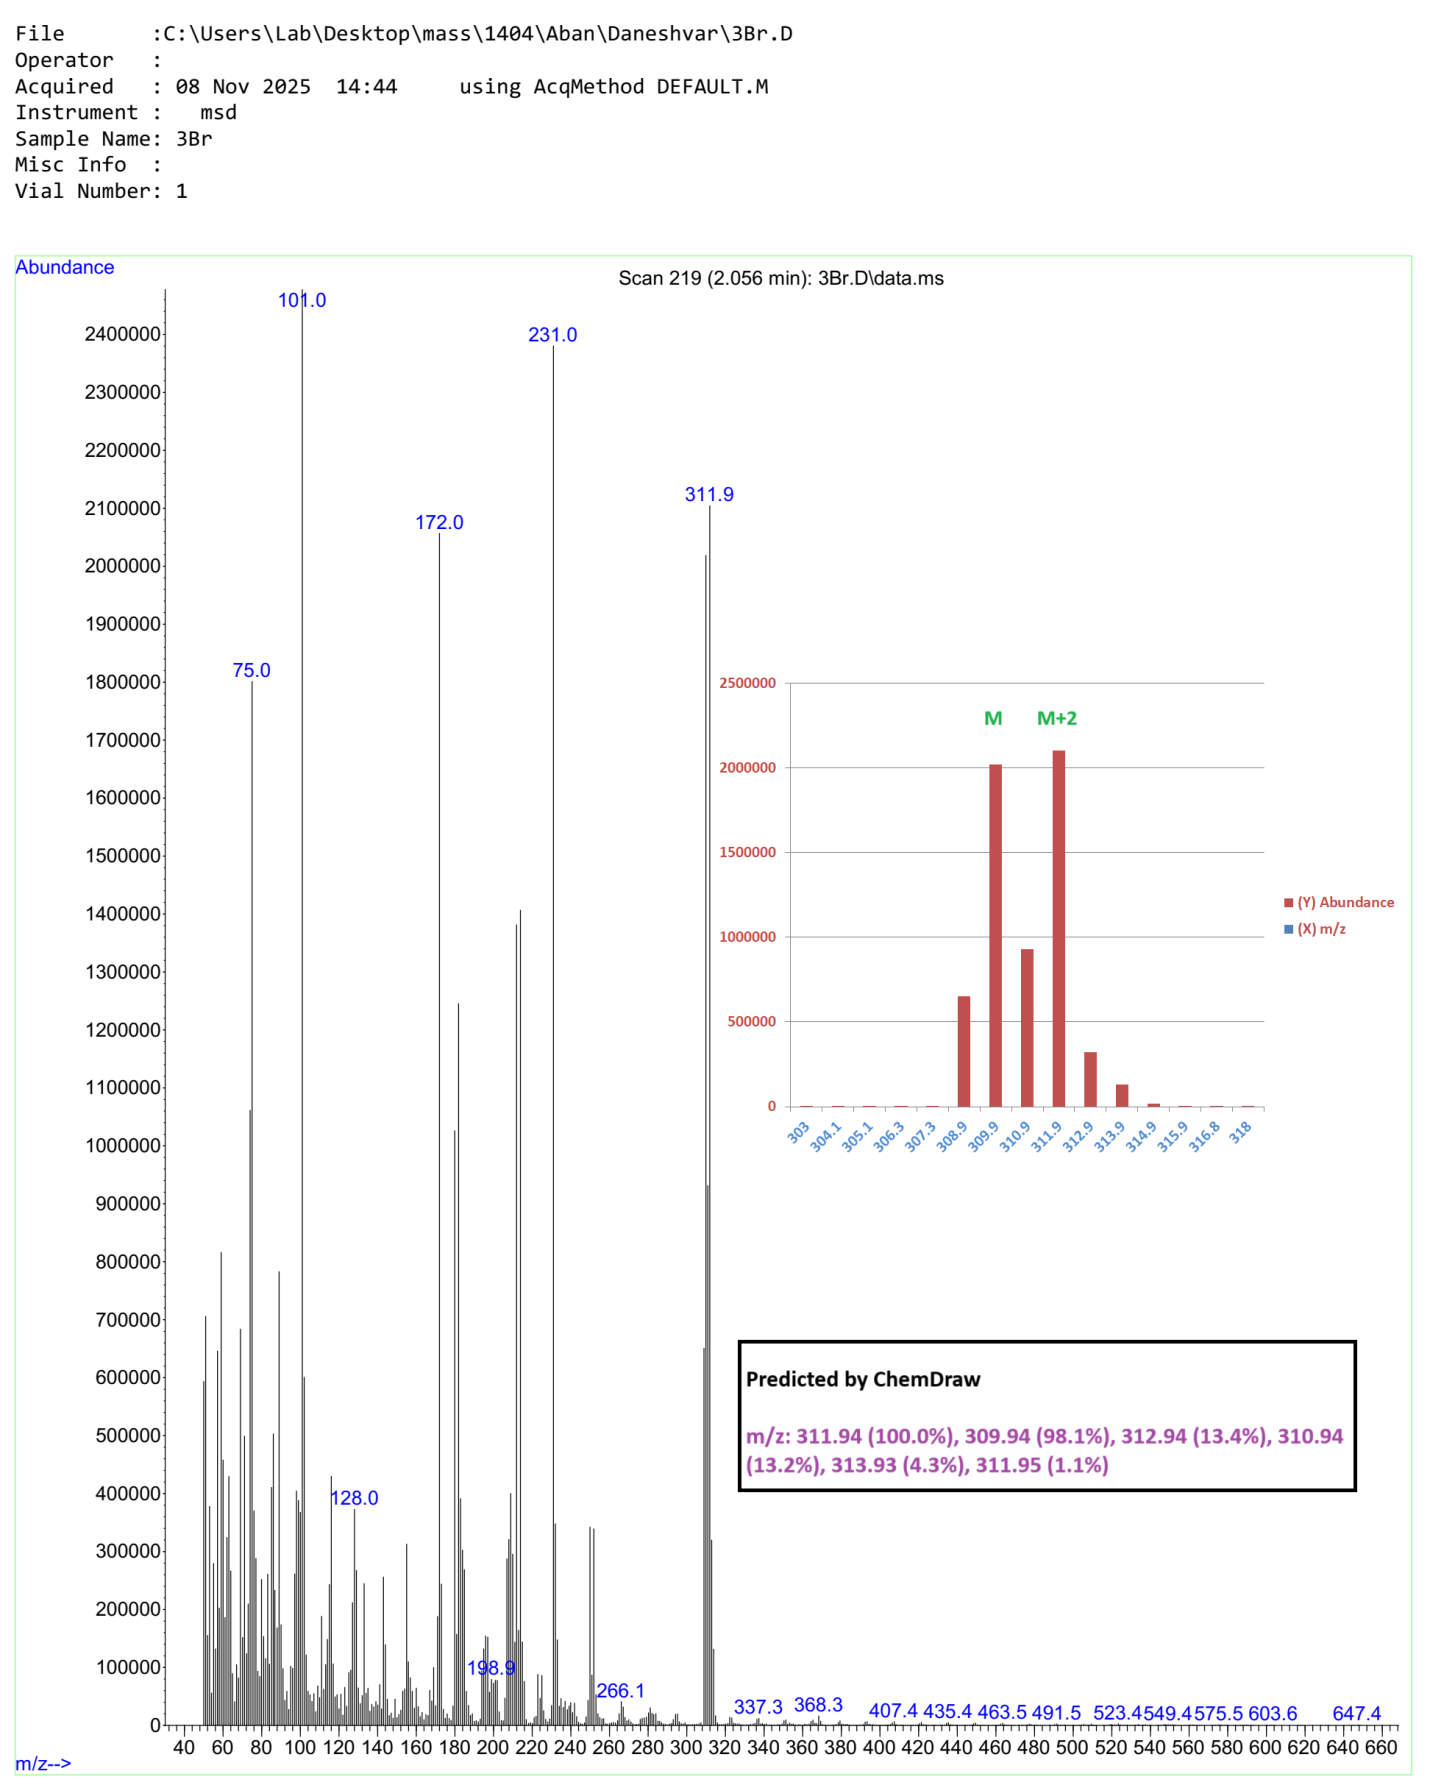


Mass analysis diagram of 5-(3-bromobenzylidene)-2-thioxodihydropyrimidine-4,6(1*H*,5*H*)-dione (Table 2, Entry 27)
